# Supplementary material
Source: PubMed Central journal article supplement (PMC4418194)
Supplement: NIHMS681510-supplement-Supporting_Information.pdf [file NIHMS681510-supplement-Supporting_Information.pdf]

Supporting Information

## Generation of Electrospun Nanofibers with Controllable Degrees of Crimping through a Simple, Plasticizer-based Treatment

By *Wenying Liu*,<sup>†</sup> *Justin Lipner*,<sup>†</sup> *Christine H. Moran*, *Liangzhu Feng*, *Xiyu Li*,  
*Stavros Thomopoulos*,\* *Younan Xia*\*

[\*] Prof. Y. Xia, W. Liu  
School of Chemical and Biomolecular Engineering  
Georgia Institute of Technology, Atlanta, GA 30332 (USA)

Prof. Y. Xia, Dr. C. H. Moran, L. Feng, X. Li  
The Wallace H. Coulter Department of Biomedical Engineering  
Georgia Institute of Technology and Emory University, Atlanta, GA 30332 (USA)

Prof. Y. Xia  
School of Chemistry and Biochemistry  
Georgia Institute of Technology, Atlanta, GA 30332 (USA)

Prof. S. Thomopoulos, J. Lipner  
Department of Orthopaedic Surgery  
Washington University in St. Louis, St. Louis, MO 63130 (USA)

E-mail: younan.xia@bme.gatech.edu (for sample preparation); and  
thomopoulos@wudosis.wustl.edu (for mechanical testing)

[†] W. Liu and J. Lipner contributed equally to this work.

[\*\*] This work was supported in part by a grant from the NIH (R01 AR060820) and startup funds from the Georgia Institute of Technology (to Y.X.). Part of the characterization work was performed at the Institute for Electronics and Nanotechnology (IEN).

Supporting information for this article is available on the WWW under <http://dx.doi.org/>.

**Video S1.** Upon submersion in ethanol, unconstrained PLA nanofiber scaffolds shrink. This is a result of the initially elongated PLA molecules releasing the residual stress produced by electrospinning.

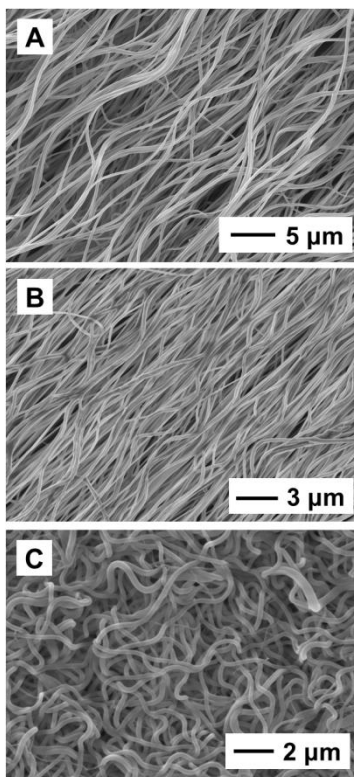

**Figure S1.** SEM images showing crimped nanofibers composed of (A) PLGA 85:15, (B) PCL/PLA blends after ethanol treatment, and (C) PVDF after DMF treatment.

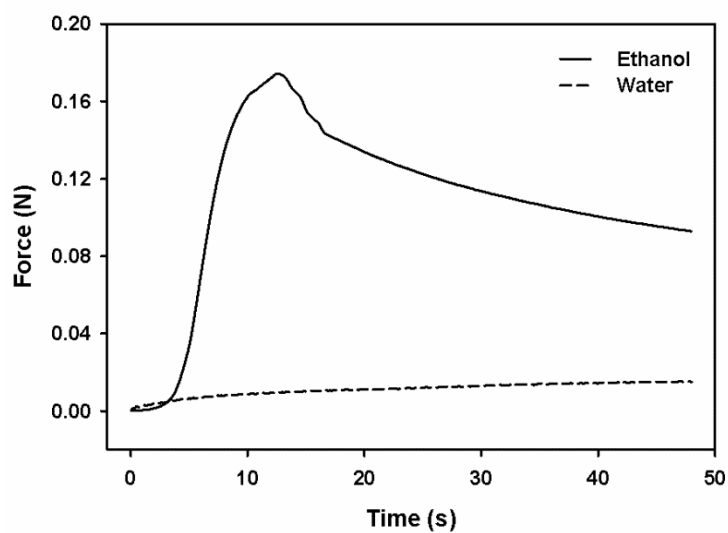

**Figure S2.** Representative timecourses of force generation for PLA electrospun nanofibers submerged in either ethanol or deionized water. Submersion in ethanol led to a rapid increase in force followed by a gradual plateau, indicating a continuous tensile force generated by the PLA nanofibers during ethanol treatment. No force was generated for nanofibers submerged in water.
